# Supplementary material
Source: PubMed Central journal article supplement (PMC7658421)
Supplement: Supppl_material.pdf [file Supppl_material.pdf]

**Table S1. CMC diagnosis codes and number of visits by health care encounter type.**

| Body system                           | Condition                                                               | Health care encounter                         |                        |                           |                                                                               |
|---------------------------------------|-------------------------------------------------------------------------|-----------------------------------------------|------------------------|---------------------------|-------------------------------------------------------------------------------|
|                                       |                                                                         | Emergency department visit or hospitalization |                        | Physician visit           |                                                                               |
|                                       |                                                                         | Codes                                         | # Visits               | Codes                     | # Visits                                                                      |
| Endocrine, nutritional, and metabolic | Type 1 or type 2 diabetes, excluding gestational diabetes <sup>18</sup> | ICD-9: 250; ICD-10: E10, E11, E13, E14        | 1                      | OHIP: 250                 | If <19 years, 4 visits; if ≥19 2 visits                                       |
|                                       | Thyroid disease <sup>19</sup>                                           | ICD-9: 242, 244; ICD-10: E00, E03, E05        | 1                      | OHIP: 242, 244            | 2                                                                             |
| Circulatory                           | Hypertension, excluding gestational hypertension <sup>20</sup>          | ICD-9: 401-405; ICD-10: I10-I13, I15          | 1                      | OHIP: 401-405             | 1 followed by an additional physician visit or hospitalization within 2 years |
|                                       | Atrial fibrillation <sup>23</sup>                                       | ICD-9: 427.3; ICD-10: I48.0                   | 1                      | OHIP: 427                 | 4                                                                             |
|                                       | Congestive heart failure <sup>22</sup>                                  | ICD-9: 428; ICD-10: I50.0, I50.1, I50.9       | 1 + 1 additional visit | OHIP: 428 or feecode Q050 | 1 + 1 additional visit                                                        |
|                                       | Myocardial infarction                                                   | ICD-9: 410; ICD-10: I21                       | 1                      | n/a                       | n/a                                                                           |

| Body system                     | Condition                                           | Health care encounter                                                                                          |          |                     |          |
|---------------------------------|-----------------------------------------------------|----------------------------------------------------------------------------------------------------------------|----------|---------------------|----------|
|                                 |                                                     | Emergency department visit or hospitalization                                                                  |          | Physician visit     |          |
|                                 |                                                     | Codes                                                                                                          | # Visits | Codes               | # Visits |
|                                 | Stroke or transient ischemic attack <sup>24</sup>   | ICD-9: 362.3, 430, 431, 434, 435, 436; ICD-10: I60, I61, I63 except I63.6, I64, H34.0, H34.1, G45 except G45.4 | 1        | OHIP: 432, 435, 436 | 2        |
| Respiratory                     | Asthma <sup>25</sup>                                | ICD-9: 493; ICD-10: J45, J46                                                                                   | 1        | OHIP: 493           | 2        |
|                                 | Chronic obstructive pulmonary disease <sup>25</sup> | ICD-9: 491, 492, 496; ICD-10: J41, J42, J43, J44                                                               | 1        | OHIP: 491, 492, 496 | 1        |
| Nervous system and sense organs | Multiple sclerosis <sup>26</sup>                    | ICD-9: 340; ICD-10: G35                                                                                        | 1        | OHIP: 340           | 5        |
|                                 | Epilepsy <sup>27</sup>                              | ICD-9: 345 except 345.2 and 345.3; ICD-10: G40                                                                 | 1        | OHIP: 345           | 3        |
|                                 | Chronic migraine <sup>28</sup>                      | ICD-9: 307.8, 346, 349, 627.2, 784; ICD-10: G43, G44, G97.1, N95.1, R51                                        | 1        | OHIP: 346           | 2        |
| Musculoskeletal                 | Osteoarthritis                                      | ICD-9: 715; ICD-10: M16-19                                                                                     | 1        | OHIP: 715           | 2        |

| Body system                  | Condition                                | Health care encounter                                                                                                                             |          |                 |                                                                |
|------------------------------|------------------------------------------|---------------------------------------------------------------------------------------------------------------------------------------------------|----------|-----------------|----------------------------------------------------------------|
|                              |                                          | Emergency department visit or hospitalization                                                                                                     |          | Physician visit |                                                                |
|                              |                                          | Codes                                                                                                                                             | # Visits | Codes           | # Visits                                                       |
|                              | Osteoporosis <sup>29</sup>               | ICD-9: 733.0; ICD-10: M80-82                                                                                                                      | 1        | OHIP: 733       | 1                                                              |
|                              | Rheumatoid arthritis <sup>30</sup>       | ICD-9: 714; ICD-10: M05, M06                                                                                                                      | 1        | OHIP: 714       | 3                                                              |
| Skin and subcutaneous tissue | Lupus <sup>31</sup>                      | ICD-9: 710.0; ICD-10: M32                                                                                                                         | 1        | OHIP: 710       | 3                                                              |
|                              | Psoriasis                                | ICD-9: 696.0, 696.1; ICD-10: L40                                                                                                                  | 1        | OHIP: 696       | 1                                                              |
| Genitourinary                | Chronic kidney disease <sup>33</sup>     | ICD-9: 403.0, 403.1, 403.9, 404.0, 404.1, 404.9, 580-587, 588.0, 588.8, 588.9, 593.7; ICD-10: E10.2, E11.2, E13.2, E14.2, I12, I13, N08, N18, N19 | 1        | OHIP: 403, 585  | 1                                                              |
| Digestive                    | Inflammatory bowel disease <sup>32</sup> | ICD-9: 555, 556; ICD-10: K50, K51                                                                                                                 |          | OHIP: 555, 556  | 5 (2 years of OHIP eligibility); 3 (<2 years OHIP eligibility) |

Abbreviations: ICD: International Statistical Classification of Diseases and Related Health Problems; OHIP: Ontario Health Insurance  
Plan Database

**Table S2. Specific chronic medical conditions and acute perinatal psychiatric health care encounters, by migrant status.** Reported as n (%) unless otherwise indicated.

|                                                       | Long-term residents | Immigrants         | Refugees    |
|-------------------------------------------------------|---------------------|--------------------|-------------|
| Chronic medical conditions <sup>a</sup>               |                     |                    |             |
| Diabetes                                              | 5,484 (0.9)         | 2,345 (1.3)        | 433 (1.5)   |
| Thyroid disease                                       | 13,899 (2.2)        | <b>7,789 (4.2)</b> | 1,069 (3.7) |
| Circulatory diseases                                  | 6,247 (1.0)         | 2,342 (1.3)        | 346 (1.2)   |
| Respiratory diseases                                  | 21,757 (3.4)        | <b>3,243 (1.7)</b> | 631 (2.2)   |
| Nervous system diseases                               | 20,911 (3.3)        | 4,585 (2.5)        | 1,083 (3.7) |
| Musculoskeletal diseases                              | 3,891 (0.6)         | 1,223 (0.7)        | 233 (0.8)   |
| Skin and subcutaneous tissue diseases                 | 6,921 (1.1)         | 1,480 (0.8)        | 197 (0.7)   |
| Other <sup>a</sup>                                    | 2,082 (0.3)         | 506 (0.3)          | 79 (0.3)    |
| Acute psychiatric health care encounters <sup>a</sup> |                     |                    |             |
| Psychotic disorders                                   | 618 (0.1)           | 155 (0.1)          | 39 (0.1)    |
| Mood or anxiety disorders                             | 5,983 (0.9)         | 898 (0.5)          | 223 (0.8)   |
| Substance use disorders                               | 971 (0.2)           | 35 (0.02)          | 11 (0.04)   |
| Self-harm                                             | 429 (0.07)          | 86 (0.05)          | 33 (0.1)    |
| Other                                                 | 805 (0.13)          | 165 (0.09)         | 29 (0.1)    |

Figures in **bold** indicate a standardized difference >0.10, long-term residents as referent

a. Values do not add up to total number with CMC, since women could have >1 CMC; b.

Includes chronic kidney disease, inflammatory bowel disease.

**Table S3. Impact of specific CMCs on the risk of any acute perinatal psychiatric health encounter, by migrant status.**

|                          | Long-term residents |                  | Immigrants         |                  | Refugees           |                         |
|--------------------------|---------------------|------------------|--------------------|------------------|--------------------|-------------------------|
|                          | N (%) with outcome  | aRR (95% CI)     | N (%) with outcome | aRR (95% CI)     | N (%) with outcome | aRR (95% CI)            |
| Diabetes                 |                     |                  |                    |                  |                    |                         |
| Present                  | 75 (1.4)            | 1.40 (1.11-1.78) | 16 (0.7)           | 1.30 (0.79-2.11) | 7 (1.6)            | 2.00 (0.93-4.30)        |
| Absent                   | 6,759 (1.1)         | [Referent]       | 970 (0.5)          | [Referent]       | 240 (0.8)          | [Referent]              |
| Thyroid disorders        |                     |                  |                    |                  |                    |                         |
| Present                  | 108 (0.8)           | 1.01 (0.84-1.22) | 35 (0.5)           | 0.90 (0.64-1.25) | 8 (0.8)            | 0.91 (0.45-1.82)        |
| Absent                   | 6,726 (1.1)         | [Referent]       | 951 (0.5)          | [Referent]       | 239 (0.9)          | [Referent]              |
| Circulatory disorders    |                     |                  |                    |                  |                    |                         |
| Present                  | 49 (0.8)            | 0.93 (0.70-1.23) | 15 (0.6)           | 1.21 (0.73-2.02) | 6 (1.7)            | <b>2.13 (0.92-4.96)</b> |
| Absent                   | 6,785 (1.1)         | [Referent]       | 971 (0.5)          | [Referent]       | 241 (0.8)          | [Referent]              |
| Respiratory disorders    |                     |                  |                    |                  |                    |                         |
| Present                  | 347 (1.6)           | 1.25 (1.12-1.39) | 20 (0.6)           | 1.06 (0.69-1.64) | 6 (1.0)            | 1.04 (0.41-2.63)        |
| Absent                   | 6,487 (1.1)         | [Referent]       | 966 (0.5)          | [Referent]       | 241 (0.8)          | [Referent]              |
| Nervous system disorders |                     |                  |                    |                  |                    |                         |
| Present                  | 481 (2.3)           | 1.76 (1.60-1.93) | 58 (1.3)           | 2.59 (1.74-2.94) | 26 (2.4)           | <b>2.79 (1.85-4.22)</b> |
| Absent                   | 6,353 (1.0)         | [Referent]       | 928 (0.5)          | [Referent]       | 221 (0.8)          | [Referent]              |
| Musculoskeletal diseases |                     |                  |                    |                  |                    |                         |
| Present                  | 47 (1.2)            | 1.26 (0.95-1.68) | *                  | *                | *                  | *                       |

|                                       | Long-term residents |                  | Immigrants         |                  | Refugees           |              |
|---------------------------------------|---------------------|------------------|--------------------|------------------|--------------------|--------------|
|                                       | N (%) with outcome  | aRR (95% CI)     | N (%) with outcome | aRR (95% CI)     | N (%) with outcome | aRR (95% CI) |
| Absent                                | 6787 (1.1)          | [Referent]       | *                  | [Referent]       | *                  | [Referent]   |
| Skin and subcutaneous tissue diseases |                     |                  |                    |                  |                    |              |
| Present                               | 65 (0.94)           | 0.97 (0.76-1.23) | 6 (0.4)            | 0.75 (0.34-1.66) | *                  | *            |
| Absent                                | 6769 (1.1)          | [Referent]       | 980 (0.53)         | [Referent]       | *                  | [Referent]   |
| Other diseases <sup>a</sup>           |                     |                  |                    |                  |                    |              |
| Present                               | 23 (1.1)            | 1.11 (0.74-1.66) | *                  | *                | *                  | *            |
| Absent                                | 6811 (1.1)          | [Referent]       | *                  | [Referent]       | *                  | [Referent]   |

aRR (95% CI) in **bold** indicates statistically significant interaction, at  $p < 0.05$ .

\* Values suppressed due to cell sizes  $< 6$ .

Adjusted models control for age, parity, low neighbourhood income, material deprivation, residential instability, dependency, ethnic concentration, remote history of mental illness, and the presence of any other CMC. We could not adjust for rurality due to small cell sizes.

**Table S4. Impact of any CMC on the risk of specific acute perinatal psychiatric health encounters by migrant category.**

|                           | Long-term residents |                  | Immigrants         |                  | Refugees           |                  |
|---------------------------|---------------------|------------------|--------------------|------------------|--------------------|------------------|
|                           | N (%) with outcome  | aRR (95% CI)     | N (%) with outcome | aRR (95% CI)     | N (%) with outcome | aRR (95% CI)     |
| Psychotic disorders       |                     |                  |                    |                  |                    |                  |
| CMC present               | 91 (0.1)            | 1.22 (0.97-1.52) | 18 (0.1)           | 1.01 (0.63-1.61) | 7 (0.2)            | 1.47 (0.64-3.35) |
| CMC absent                | 527 (0.1)           | [Referent]       | 137 (0.1)          | [Referent]       | 32 (0.1)           | [Referent]       |
| Mood or anxiety disorders |                     |                  |                    |                  |                    |                  |
| CMC present               | 959 (1.3)           | 1.39 (1.30-1.49) | 127 (0.6)          | 1.25 (1.03-1.51) | 46 (1.3)           | 1.86 (1.33-2.61) |
| CMC absent                | 5,024 (0.9)         | [Referent]       | 771 (0.5)          | [Referent]       | 177 (0.7)          | [Referent]       |
| Substance use disorders   |                     |                  |                    |                  |                    |                  |
| CMC present               | 152 (0.2)           | 1.36 (1.14-1.63) | *                  | *                | *                  | *                |
| CMC absent                | 819 (0.1)           | [Referent]       | *                  | [Referent]       | *                  | [Referent]       |
| Self-harm                 |                     |                  |                    |                  |                    |                  |
| CMC present               | 57 (0.1)            | 1.23 (0.93-1.64) | 11 (0.1)           | 1.15 (0.61-2.17) | *                  | *                |
| CMC absent                | 372 (0.1)           | [Referent]       | 75 (0.1)           | [Referent]       | *                  | [Referent]       |
| Other                     |                     |                  |                    |                  |                    |                  |
| CMC present               | 132 (0.2)           | 1.42 (1.17-1.70) | 21 (0.1)           | 1.65 (1.20-2.27) | 6 (0.2)            | **               |
| CMC absent                | 673 (0.1)           | [Referent]       | 144 (0.1)          | [Referent]       | 23 (0.1)           | [Referent]       |

aRR (95% CI) in **bold** indicates statistically significant interaction, at p<0.05.

\* Values suppressed due to cell size <6; \*\* Model did not converge due to small numbers.



Adjusted models control for age, parity, low neighbourhood income, material deprivation, residential instability, dependency, ethnic concentration, and remote history of mental illness. We could not adjust for rurality due to small cell sizes.
